# Supplementary material for: Abnormal Cerebral Blood Flow and Functional Connectivity Strength in Subjects With White Matter Hyperintensities
Source: Frontiers journal article supplement (doi:10.3389/fneur.2021.752762), 2021-10-20
Supplement: Data_Sheet_1.pdf [file Data_Sheet_1.pdf]

**Supplementary Material for**

**Abnormal Cerebral Blood Flow and Functional Connectivity Strength**

**in Subjects with White Matter Hyperintensities**

## Supplementary Methods

To validate the alteration patterns of CBF, FCS and CBF-FCS coupling in subjects with higher WMH loads, 16 age-, sex-, and education- matched subjects without any WMH or cognitive impairment from the in-house database were additionally included as healthy controls (HCs) in the control analysis. Written informed consent has been obtained from each participant. The HCs should meet the following criteria: 1) 50-80 years old, right-handedness; 2) no visible WMH (Fazekas scale of 0); 3) > 5 years of education; 4) no subjective cognitive complaints or objective cognitive impairment; 5) no MRI contraindication. The HCs should also not meet the exclusion criteria for subjects with WMH included in this study and undergo the same protocols of neuropsychological assessment and MRI scans. In addition, we restricted the further analysis in participants with no excessive head motion (no more than 3° angular rotation on any axis or 3 mm translation), and no HCs were excluded according to the criteria.

The same quality control criteria and preprocessing pipeline described in the main text were applied to the HCs. In consideration of the very small sample size in the HC group, for each neuroimaging measure, here we just conducted correlation analyses between *t*-scores of the HC group vs the moderate/severe WMH group and *t*-scores of the mild WMH group vs moderate/severe WMH group to verify the alteration patterns of these measures in subjects with higher WMH loads. Pearson's correlation coefficient of *t*-scores of *t*-test between groups (with age and sex controlled) was calculated at the regional level.

**Supplementary Table 1. Raw neuropsychological data of the three WMH groups.**

|                        | <b>Mild WMH</b>        | <b>Moderate WMH</b>    | <b>Severe WMH</b>             | <b>Overall</b>        |
|------------------------|------------------------|------------------------|-------------------------------|-----------------------|
|                        | <b>(<i>n</i> = 32)</b> | <b>(<i>n</i> = 24)</b> | <b>(<i>n</i> = 30)</b>        | <b><i>p</i> Value</b> |
| MMSE                   | 28.78 ± 1.48           | 28.88 ± 1.68           | 27.00 ± 2.53 <sup>c,d</sup>   | < 0.001 <sup>a</sup>  |
| VFT                    | 23.72 ± 5.06           | 22.58 ± 6.93           | 20.27 ± 5.83                  | 0.061 <sup>b</sup>    |
| TMT-A                  | 70.74 ± 37.91          | 67.27 ± 38.52          | 93.86 ± 47.00 <sup>d</sup>    | 0.048 <sup>a</sup>    |
| TMT B                  | 132.88 ± 54.06         | 140.21 ± 67.82         | 193.06 ± 79.00 <sup>c,d</sup> | 0.001 <sup>b</sup>    |
| AVLT long delay recall | 7.03 ± 2.44            | 6.46 ± 2.64            | 4.77 ± 2.69 <sup>c</sup>      | 0.005 <sup>b</sup>    |

The data are presented as the mean ± SD.

<sup>a</sup> Kruskal-Wallis test.

<sup>b</sup> One-way analysis of variance.

<sup>c</sup> Significant difference between the mild WMH and severe WMH groups.

<sup>d</sup> Significant difference between the moderate WMH and severe WMH groups.

AVLT, Auditory Verbal Learning Test; Mini-Mental State Examination TMT, Trail Making Test; VFT, Verbal Fluency Test.

**Supplementary Table 2. Differences in global CBF and FCS among the three groups.**

|                    | Mean CBF      |               |                            | ANOVA    |          |
|--------------------|---------------|---------------|----------------------------|----------|----------|
|                    | Mild WMH      | Moderate WMH  | Severe WMH                 | <i>F</i> | <i>p</i> |
| CBF (ml/100 g/min) | 57.51±10.94   | 53.98±10.31   | 49.54±9.37 <sup>a</sup>    | 3.8722   | 0.0247   |
| FCS                | 0.0067±0.0033 | 0.0054±0.0025 | 0.0048±0.0020 <sup>a</sup> | 5.2421   | 0.0072   |

Absolute values of CBF and FCS in whole grey matter in the three groups are shown as the mean ± SD. Age and sex were entered as covariates in the analysis.

<sup>a</sup> Significant difference between the mild WMH and severe WMH groups.

*F*, *F*-value of ANOVA. CBF, cerebral blood flow; FCS, functional connectivity strength; WMH, white matter hyperintensities.

**Supplementary Table 3. Differences in regional CBF among the three groups.**

| Brain Area | Mean CBF      |               |               | ANOVA    |          | Mild WMH vs moderate WMH |          | Mild WMH vs severe WMH |          | Moderate WMH vs severe WMH |          |
|------------|---------------|---------------|---------------|----------|----------|--------------------------|----------|------------------------|----------|----------------------------|----------|
|            | Mild WMH      | Moderate WMH  | Severe WMH    | <i>F</i> | <i>p</i> | <i>t</i>                 | <i>p</i> | <i>t</i>               | <i>p</i> | <i>t</i>                   | <i>p</i> |
| BG_R_6_5   | 49.719±7.539  | 47.539±4.896  | 43.895±4.908  | 7.3358   | 0.0012   | 1.2339                   | 0.2226   | 3.5792                 | 0.0007   | 2.7141                     | 0.0090   |
| CG_L_7_1   | 78.534±13.153 | 72.214±13.783 | 65.790±13.474 | 6.9594   | 0.0016   | 1.7433                   | 0.0870   | 3.7678                 | 0.0004   | 1.7233                     | 0.0908   |
| CG_L_7_3   | 60.637±10.244 | 57.146±11.050 | 51.947±9.032  | 5.8020   | 0.0044   | 1.2200                   | 0.2277   | 3.5337                 | 0.0008   | 1.9034                     | 0.0625   |
| CG_L_7_6   | 59.676±10.567 | 55.875±10.923 | 50.992±10.684 | 5.1035   | 0.0081   | 1.3130                   | 0.1947   | 3.2162                 | 0.0021   | 1.6522                     | 0.1045   |
| CG_R_7_1   | 89.311±15.879 | 83.357±15.616 | 74.927±14.482 | 6.8527   | 0.0018   | 1.3983                   | 0.1678   | 3.7189                 | 0.0004   | 2.0531                     | 0.0451   |
| CG_R_7_2   | 78.420±11.303 | 74.790±10.569 | 69.932±8.346  | 5.4333   | 0.0061   | 1.2224                   | 0.2269   | 3.3452                 | 0.0014   | 1.8882                     | 0.0646   |
| CG_R_7_4   | 77.150±14.410 | 72.781±9.758  | 67.264±11.353 | 5.0886   | 0.0082   | 1.2798                   | 0.2061   | 2.9871                 | 0.0041   | 1.8869                     | 0.0648   |
| IFG_R_6_2  | 67.224±13.710 | 62.674±12.339 | 56.731±10.793 | 5.5830   | 0.0053   | 1.2818                   | 0.2054   | 3.3333                 | 0.0015   | 1.8866                     | 0.0648   |
| IFG_R_6_5  | 65.123±11.587 | 60.614±10.105 | 56.765±8.374  | 5.2716   | 0.0070   | 1.5209                   | 0.1341   | 3.2364                 | 0.0020   | 1.5307                     | 0.1319   |
| INS_L_6_1  | 65.301±8.607  | 61.505±10.972 | 57.182±9.522  | 5.5071   | 0.0057   | 1.4517                   | 0.1524   | 3.5261                 | 0.0008   | 1.5493                     | 0.1274   |
| INS_L_6_2  | 77.954±7.773  | 77.641±12.867 | 70.649±9.233  | 5.1207   | 0.0080   | 0.1130                   | 0.9105   | 3.3780                 | 0.0013   | 2.3234                     | 0.0241   |
| INS_R_6_3  | 67.193±10.456 | 62.484±9.827  | 57.151±9.029  | 8.1287   | 0.0006   | 1.7108                   | 0.0929   | 4.0355                 | 0.0002   | 2.0741                     | 0.0430   |
| INS_R_6_6  | 57.640±8.733  | 55.127±8.237  | 50.073±7.731  | 6.6714   | 0.0021   | 1.0917                   | 0.2798   | 3.6034                 | 0.0006   | 2.3190                     | 0.0244   |
| IPL_L_6_5  | 55.828±12.252 | 52.218±13.243 | 45.659±12.432 | 5.1400   | 0.0079   | 1.0540                   | 0.2966   | 3.2430                 | 0.0019   | 1.8717                     | 0.0669   |
| IPL_L_6_6  | 64.057±9.454  | 59.843±12.231 | 54.973±10.245 | 5.7320   | 0.0047   | 1.4552                   | 0.1514   | 3.6312                 | 0.0006   | 1.5924                     | 0.1174   |
| IPL_R_6_1  | 59.884±13.963 | 53.776±13.374 | 49.003±12.941 | 5.1009   | 0.0081   | 1.6491                   | 0.1049   | 3.1766                 | 0.0024   | 1.3270                     | 0.1903   |
| IPL_R_6_5  | 50.670±13.760 | 43.680±13.194 | 40.047±12.115 | 5.3054   | 0.0068   | 1.9144                   | 0.0609   | 3.2175                 | 0.0021   | 1.0524                     | 0.2975   |
| IPL_R_6_6  | 65.804±13.420 | 60.441±12.287 | 55.990±10.005 | 5.1981   | 0.0075   | 1.5337                   | 0.1310   | 3.2472                 | 0.0019   | 1.4678                     | 0.1482   |
| ITG_R_7_1  | 51.246±10.382 | 47.661±9.545  | 42.285±7.140  | 7.5205   | 0.0010   | 1.3232                   | 0.1913   | 3.9342                 | 0.0002   | 2.3679                     | 0.0216   |
| MFG_R_7_2  | 62.884±13.750 | 57.379±10.754 | 53.389±9.728  | 5.1955   | 0.0075   | 1.6230                   | 0.1104   | 3.1198                 | 0.0028   | 1.4290                     | 0.1590   |
| MFG_R_7_3  | 64.933±12.413 | 59.186±13.100 | 54.238±11.714 | 5.8043   | 0.0044   | 1.6746                   | 0.0998   | 3.4836                 | 0.0009   | 1.4632                     | 0.1494   |
| MFG_R_7_4  | 77.601±14.440 | 73.198±13.448 | 66.291±11.114 | 5.8431   | 0.0042   | 1.1624                   | 0.2502   | 3.4391                 | 0.0011   | 2.0669                     | 0.0437   |

|            |               |               |               |        |        |        |        |        |        |        |        |
|------------|---------------|---------------|---------------|--------|--------|--------|--------|--------|--------|--------|--------|
| OrG_R_6_6  | 67.199±11.199 | 62.311±9.474  | 58.839±9.649  | 5.2489 | 0.0071 | 1.7240 | 0.0904 | 3.1393 | 0.0026 | 1.3244 | 0.1912 |
| PCun_L_4_4 | 81.908±14.505 | 75.612±14.507 | 69.391±16.159 | 5.3195 | 0.0067 | 1.6075 | 0.1138 | 3.2137 | 0.0021 | 1.4702 | 0.1475 |
| pSTS_L_2_2 | 53.198±11.058 | 48.058±12.966 | 43.324±12.956 | 5.0085 | 0.0088 | 1.5984 | 0.1158 | 3.2341 | 0.0020 | 1.3336 | 0.1881 |
| pSTS_R_2_1 | 47.305±11.979 | 41.045±11.349 | 37.709±10.276 | 5.8290 | 0.0043 | 1.9788 | 0.0529 | 3.3749 | 0.0013 | 1.1318 | 0.2629 |
| pSTS_R_2_2 | 43.680±12.592 | 36.798±11.539 | 32.550±10.783 | 7.1550 | 0.0014 | 2.0968 | 0.0407 | 3.7265 | 0.0004 | 1.3944 | 0.1691 |
| STG_R_6_2  | 61.283±11.679 | 56.574±11.653 | 51.949±9.991  | 5.4665 | 0.0059 | 1.4946 | 0.1408 | 3.3710 | 0.0013 | 1.5698 | 0.1225 |
| Tha_L_8_7  | 58.175±9.867  | 55.954±9.908  | 48.639±11.022 | 7.1081 | 0.0014 | 0.8320 | 0.4090 | 3.5937 | 0.0007 | 2.5333 | 0.0144 |
| Tha_R_8_1  | 61.334±12.803 | 57.803±9.898  | 51.956±11.321 | 5.1796 | 0.0076 | 1.1219 | 0.2669 | 3.0474 | 0.0034 | 1.9927 | 0.0516 |
| Tha_R_8_6  | 67.443±11.545 | 65.096±10.490 | 58.996±9.080  | 5.3041 | 0.0068 | 0.7825 | 0.4374 | 3.1878 | 0.0023 | 2.2894 | 0.0261 |
| Tha_R_8_7  | 75.014±11.516 | 71.516±9.208  | 63.993±9.920  | 9.0265 | 0.0003 | 1.2229 | 0.2267 | 4.0252 | 0.0002 | 2.8580 | 0.0061 |

CBF in the three groups is shown as the mean  $\pm$  SD ( $p < 0.01$ , permutation test for 1,000 times), controlling for age and sex.  $F$ ,  $F$ -value of ANOVA;  $t$ ,  $t$ -score of the post hoc analysis. CBF, cerebral blood flow; FCS, functional connectivity strength; WMH, white matter hyperintensities.

BG, basal ganglia; CG, cingulate gyrus; IFG, inferior frontal gyrus; INS, insular gyrus; IPL, inferior parietal lobule; ITG, inferior temporal gyrus; MFG, middle frontal gyrus; OrG, orbital gyrus; Pcun, Precuneus; pSTS, Posterior superior temporal sulcus; STG, superior temporal gyrus; Tha, thalamus; L, left; R, right. Detailed information on the brain regions is available at <http://atlas.brainnetome.org/>.

**Supplementary Table 4. Differences in regional FCS among the three groups.**

| Brain Area | Mean FCS       |                |                | ANOVA    |          | Mild WMH vs moderate WMH |          | Mild WMH vs severe WMH |          | Moderate WMH vs severe WMH |          |
|------------|----------------|----------------|----------------|----------|----------|--------------------------|----------|------------------------|----------|----------------------------|----------|
|            | Mild WMH       | Moderate WMH   | Severe WMH     | <i>F</i> | <i>p</i> | <i>t</i>                 | <i>p</i> | <i>t</i>               | <i>p</i> | <i>t</i>                   | <i>p</i> |
| INS_L_6_2  | -0.0125±0.0061 | -0.0105±0.0084 | -0.0156±0.0034 | 4.8833   | 0.0099   | -1.0445                  | 0.3009   | 2.4598                 | 0.0168   | 3.0612                     | 0.0035   |
| IPL_L_6_3  | 0.0249±0.0057  | 0.0204±0.0041  | 0.0200±0.0043  | 9.6844   | 0.0002   | 3.2460                   | 0.0020   | 3.8120                 | 0.0003   | 0.4011                     | 0.6900   |
| IPL_L_6_6  | 0.0198±0.0075  | 0.0158±0.0040  | 0.0158±0.0046  | 4.9544   | 0.0093   | 2.3788                   | 0.0209   | 2.5322                 | 0.0140   | 0.0033                     | 0.9974   |
| IPL_R_6_1  | 0.0222±0.0100  | 0.0164±0.0045  | 0.0160±0.0056  | 6.7035   | 0.0020   | 2.6358                   | 0.0109   | 2.9625                 | 0.0044   | 0.2559                     | 0.7990   |
| IPL_R_6_3  | 0.0202±0.0056  | 0.0178±0.0055  | 0.0157±0.0045  | 5.8128   | 0.0043   | 1.5655                   | 0.1233   | 3.4895                 | 0.0009   | 1.5868                     | 0.1186   |
| IPL_R_6_6  | 0.0207±0.0082  | 0.0163±0.0047  | 0.0153±0.0056  | 5.8666   | 0.0041   | 2.3277                   | 0.0237   | 2.9786                 | 0.0042   | 0.6928                     | 0.4915   |
| ITG_L_7_6  | 0.0191±0.0084  | 0.0146±0.0040  | 0.0145±0.0037  | 5.9199   | 0.0040   | 2.4292                   | 0.0185   | 2.7745                 | 0.0074   | 0.1176                     | 0.9069   |
| ITG_R_7_5  | 0.0108±0.0066  | 0.0080±0.0036  | 0.0067±0.0027  | 5.9782   | 0.0038   | 1.9034                   | 0.0623   | 3.1194                 | 0.0028   | 1.4295                     | 0.1588   |
| PCL_R_2_1  | 0.0263±0.0067  | 0.0222±0.0025  | 0.0228±0.0042  | 5.6476   | 0.0050   | 2.7901                   | 0.0073   | 2.3995                 | 0.0195   | -0.6050                    | 0.5478   |
| PCun_R_4_2 | 0.0168±0.0059  | 0.0128±0.0022  | 0.0133±0.0044  | 6.6769   | 0.0020   | 3.1631                   | 0.0026   | 2.6267                 | 0.0109   | -0.5338                    | 0.5957   |
| SFG_L_7_3  | 0.0349±0.0082  | 0.0284±0.0040  | 0.0322±0.0081  | 5.5311   | 0.0056   | 3.5881                   | 0.0007   | 1.2729                 | 0.2080   | -2.1289                    | 0.0380   |

FCS in the three groups is shown as the mean ± SD ( $p < 0.01$ , permutation test for 1,000 times), controlling for age and sex. *F*, *F*-value of ANOVA; *t*, *t*-score of the post hoc analysis. FCS, functional connectivity strength; WMH, white matter hyperintensities.

CG, cingulate gyrus; INS, insular gyrus; IPL, inferior parietal lobule; ITG, inferior temporal gyrus; PCL, paracentral lobule; PCun, Precuneus; STG, superior temporal gyrus; L, left; R, right. Detailed information on the brain regions is available at <http://atlas.brainnetome.org/>.

**Supplementary Table 5. Differences in regional CBF and FCS coupling among the three groups.**

| Brain Area | Mean coefficient of CBF-FCS coupling |              |              | ANOVA    |          | Mild WMH vs moderate WMH |          | Mild WMH vs severe WMH |          | Moderate WMH vs severe WMH |          |
|------------|--------------------------------------|--------------|--------------|----------|----------|--------------------------|----------|------------------------|----------|----------------------------|----------|
|            | Mild WMH                             | Moderate WMH | Severe WMH   | <i>F</i> | <i>p</i> | <i>t</i>                 | <i>p</i> | <i>t</i>               | <i>p</i> | <i>t</i>                   | <i>p</i> |
| CG_L_7_4   | 1.394±0.195                          | 1.289±0.229  | 1.190±0.281  | 5.7123   | 0.0047   | 1.8451                   | 0.0705   | 3.3338                 | 0.0015   | 1.3959                     | 0.1687   |
| PhG_L_6_6  | 0.148±0.396                          | 0.141±0.451  | -0.229±0.423 | 7.6993   | 0.0009   | 0.0680                   | 0.9460   | 3.6279                 | 0.0006   | 3.0958                     | 0.0032   |
| Tha_L_8_5  | 1.264±0.158                          | 1.243±0.224  | 1.065±0.353  | 5.3419   | 0.0066   | 0.4090                   | 0.6841   | 2.8998                 | 0.0052   | 2.1511                     | 0.0361   |
| Tha_R_8_3  | 1.055±0.400                          | 0.967±0.388  | 0.733±0.389  | 5.4671   | 0.0059   | 0.8229                   | 0.4142   | 3.2112                 | 0.0021   | 2.2033                     | 0.0320   |
| Tha_R_8_8  | 0.740±0.349                          | 0.653±0.338  | 0.416±0.356  | 7.0457   | 0.0015   | 0.9288                   | 0.3571   | 3.6199                 | 0.0006   | 2.4908                     | 0.0160   |

The correlation coefficient between regional CBF and FCS in the three groups is shown as the mean  $\pm$  SD ( $p < 0.01$ , permutation test for 1,000 times), controlling for age and sex. *F*, *F*-value of ANOVA; *t*, *t*-score of the post hoc analysis. CBF, cerebral blood flow; FCS, functional connectivity strength; WMH, white matter hyperintensities.

CG, cingulate gyrus; PhG, parahippocampal gyrus; Tha, thalamus; L, left; R, right. Detailed information on the brain regions is available at <http://atlas.brainnetome.org/>.



**Supplementary Table 6. Regions in which significant correlations between hemodynamic neuroimaging measures and cognitive performance in subjects with WMH subjects were identified.**

| <b>Brain region</b>                                                                              | <b>r</b> | <b>p</b> |
|--------------------------------------------------------------------------------------------------|----------|----------|
| Significant associations between regional CBF and global cognitive function in subjects with WMH |          |          |
| ITG_R_7_1                                                                                        | 0.238    | 0.030    |
| Significant associations between regional CBF and processing speed in the subjects with WMH      |          |          |
| ITG_R_7_1                                                                                        | 0.280    | 0.010    |
| IFG_R_6_2                                                                                        | 0.219    | 0.047    |
| IFG_R_6_5                                                                                        | 0.239    | 0.029    |
| OrG_R_6_6                                                                                        | 0.254    | 0.020    |
| STG_R_6_2                                                                                        | 0.249    | 0.023    |
| INS_L_6_1                                                                                        | 0.258    | 0.018    |
| INS_R_6_6                                                                                        | 0.228    | 0.038    |
| BG_R_6_5                                                                                         | 0.219    | 0.047    |
| Significant associations between regional CBF and executive function in the subjects with WMH    |          |          |
| ITG_R_7_1                                                                                        | 0.314    | 0.004    |
| IFG_R_6_2                                                                                        | 0.290    | 0.008    |
| IFG_R_6_5                                                                                        | 0.245    | 0.025    |
| MFG_R_7_2                                                                                        | 0.239    | 0.030    |
| OrG_R_6_6                                                                                        | 0.254    | 0.021    |
| STG_R_6_2                                                                                        | 0.301    | 0.006    |
| IPL_R_6_6                                                                                        | 0.229    | 0.037    |
| INS_L_6_1                                                                                        | 0.260    | 0.018    |
| INS_R_6_6                                                                                        | 0.266    | 0.015    |
| CG_R_7_2                                                                                         | 0.221    | 0.044    |
| BG_R_6_5                                                                                         | 0.290    | 0.008    |

|                                                                                                                           |       |       |
|---------------------------------------------------------------------------------------------------------------------------|-------|-------|
| Significant association between regional CBF and episodic memory in the subjects with WMH                                 |       |       |
| ITG_R_7_1                                                                                                                 | 0.368 | 0.001 |
| Significant association between regional FCS and executive function in subjects with WMH                                  |       |       |
| IPL_L_6_3                                                                                                                 | 0.268 | 0.014 |
| Significant associations between regional CBF-FCS coupling coefficient and global cognitive function in subjects with WMH |       |       |
| Tha_L_8_5                                                                                                                 | 0.221 | 0.045 |

BG, basal ganglia; CG, cingulate gyrus; IFG, inferior frontal gyrus; INS, insular gyrus; IPL, inferior parietal lobule;

ITG, inferior temporal gyrus; MFG, middle frontal gyrus; OrG, orbital gyrus; STG, superior temporal gyrus; Tha,

thalamus; L, left; R, right. Detailed information on the brain regions is available at <http://atlas.brainnetome.org/>.

**Supplementary Table 7. Mediation effect of CBF on the relationship between WMH scale and cognition.**

| Mediators                                                                                                                                                            | Path a  |          | Path b  |          | Direct effect (path c') |          | Mediation effect<br>(path a*b) |                 |
|----------------------------------------------------------------------------------------------------------------------------------------------------------------------|---------|----------|---------|----------|-------------------------|----------|--------------------------------|-----------------|
|                                                                                                                                                                      | $\beta$ | <i>p</i> | $\beta$ | <i>p</i> | $\beta$                 | <i>p</i> | $\beta$                        | 95%CI           |
| Mediation effect on the association between WMH scale and executive function, with age, sex, education as covariates. Total effect: $\beta_c = -0.156$ $p = 0.003$ . |         |          |         |          |                         |          |                                |                 |
| ITG_R_7_1                                                                                                                                                            | -1.948  | 0.001    | 0.020   | 0.040    | -0.117                  | 0.030    | -0.039                         | (-0.083,-0.008) |
| BG_R_6_5                                                                                                                                                             | -1.619  | <0.001   | 0.024   | 0.116    | -0.117                  | 0.040    | -0.039                         | (-0.086,-0.001) |
| Mediation effect on the association between WMH scale and episodic memory, with age, sex, education as covariates. Total effect: $\beta_c = -0.121$ $p = 0.026$      |         |          |         |          |                         |          |                                |                 |
| ITG_R_7_1                                                                                                                                                            | -1.948  | 0.001    | 0.029   | 0.004    | -0.065                  | 0.234    | -0.056                         | (-0.103,-0.019) |

The table shows the areas in which regional CBF mediate the relationship between WMH and cognition. Mediation analysis was used to assess the potential indirect relationship between WMH load (presented as Fazekas score) (X) and cognitive performance (Y) via mean CBF in regions identified by between-group analyses (M). In each model, age, sex, years of education were entered as covariates. Paths a and b indicate the association between WMH load and regional CBF, and the associations between regional CBF and cognition (when both WMH load and regional CBF were entered into the model as predictive variables), respectively. Path c represents the total effect of WMH load on cognition, and path c' shows the direct effect of WMH load on cognition after controlling for regional CBF as a mediating factor. The mediating role of regional CBF on the association between WMH load and cognition is defined by the 95% bootstrap CI for 5,000 bootstrapping iterations. Significant mediation effects were defined by a 95% CI entirely above or below 0. Total effect( $\beta_c$ ) = Direct effect( $\beta_{c'}$ ) + Mediation effect( $\beta_a \beta_b$ ).

$\beta$ , standardized regression coefficient; CI, confidence interval; X, predictor variable; Y, outcome variable; M, mediator; BG, basal ganglia; ITG, inferior temporal gyrus; L, left; R, right. Detailed information on the brain regions is available at <http://atlas.brainnetome.org/>.

**Supplementary Table 8. Demographic, neuropsychological and MRI features of the healthy controls.**

| <b>Demographic data</b>        |                |
|--------------------------------|----------------|
| Age (years)                    | 60.50 ± 7.64   |
| Gender (male/female)           | 10/6           |
| Education (years)              | 11.00 ± 3.79   |
| Hypertension (yes/no)          | 1/15           |
| Diabetes (yes/no)              | 0/16           |
| Smoking history (yes/no)       | 5/11           |
| Drinking history (yes/no)      | 5/11           |
| <b>Neuropsychological data</b> |                |
| MMSE                           | 29.00 ± 1.15   |
| VFT                            | 24.00 ± 11.64  |
| TMT-A                          | 74.87 ± 28.97  |
| TMT B                          | 130.31 ± 58.13 |
| AVLT long delay recall         | 7.88 ± 2.72    |
| <b>MRI features</b>            |                |
| Gray matter volume (ml)        | 613.96 ± 40.56 |
| Framewise displacement         | 0.12 ± 0.05    |

No significant differences in age, sex, years of education, grey matter volume and framewise displacement were identified among the HC group and the three WMH groups. There were also no significant differences in other demographic, neuropsychological and neuroimaging metrics between the HC group and the mild WMH group.

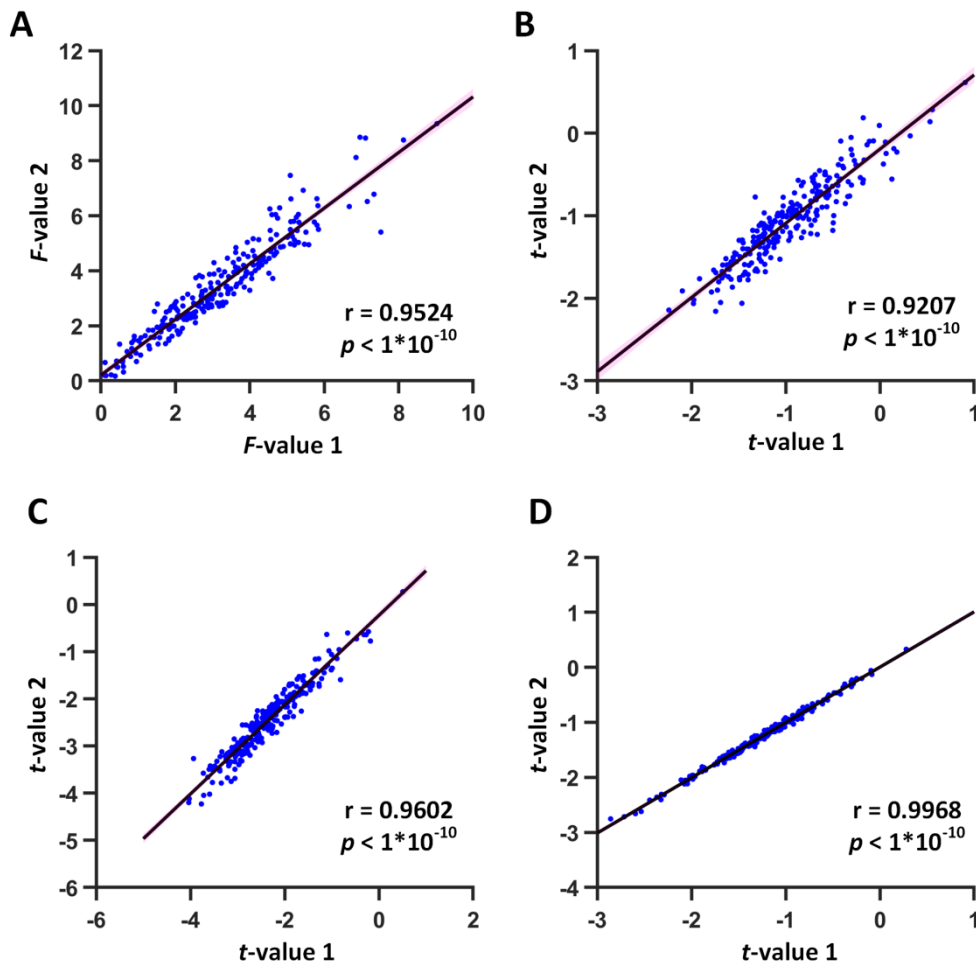

**Supplementary Figure 1. Correlation analyses of the among-group differences in regional CBF with and without controlling for hypertension and diabetes.** (A) The scatter plot of correlation analyses between the *F*-scores of ANOVA with (y-axis) and without (x-axis) controlling for hypertension and diabetes. (B, C, D) The scatter plots showing the correlation analyses between the *t*-scores of the moderate WMH group vs the mild WMH group (B), the *t*-scores of the severe WMH group vs the mild WMH group (C), and the *t*-scores of the severe WMH group vs the moderate WMH group (D), with (y-axis) and without (x-axis) controlling for hypertension and diabetes. *r*, Pearson's correlation coefficient. CBF, cerebral blood flow.

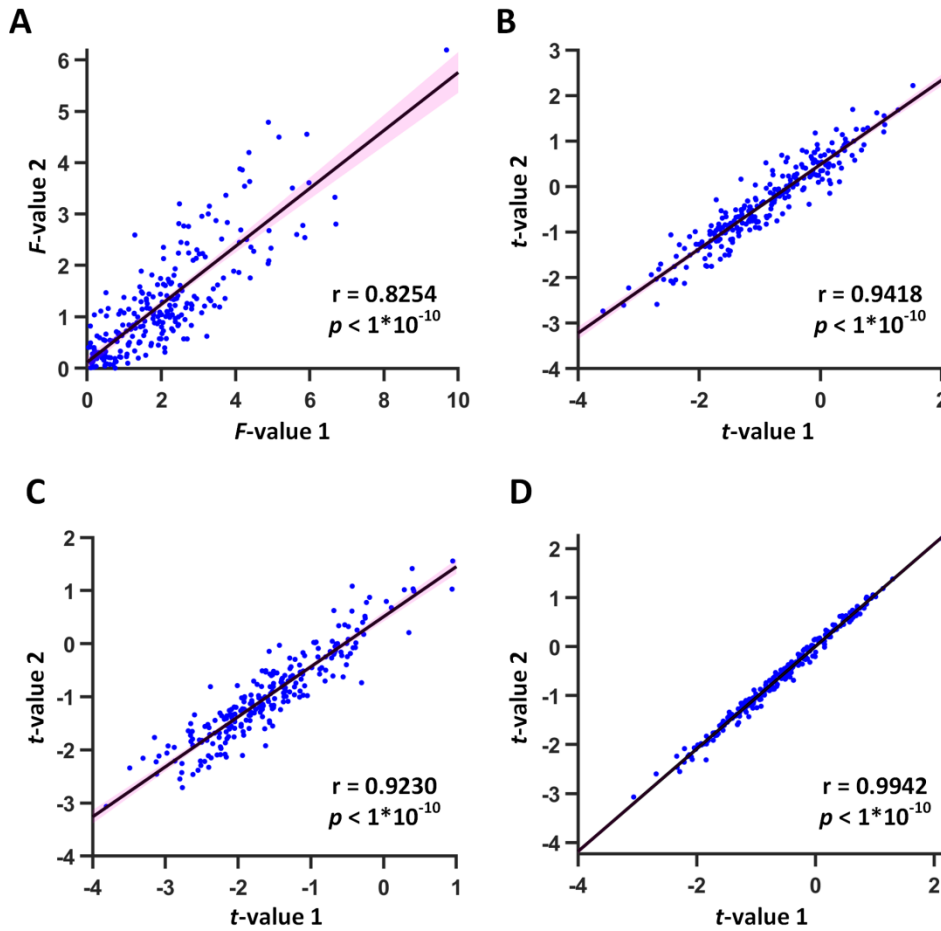

**Supplementary Figure 2. Correlation analyses of the among-group differences in regional FCS with and without controlling for hypertension and diabetes.** (A) The scatter plot of correlation analyses between the *F*-scores of ANOVA with (y-axis) and without (x-axis) controlling for hypertension and diabetes. (B, C, D) The scatter plots showing the correlation analyses between the *t*-scores of the moderate WMH group vs the mild WMH group (B), the *t*-scores of the severe WMH group vs the mild WMH group (C), and the *t*-scores of the severe WMH group vs the moderate WMH group (D), with (y-axis) and without (x-axis) controlling for hypertension and diabetes.

*r*, Pearson's correlation coefficient. FCS, functional connectivity strength.

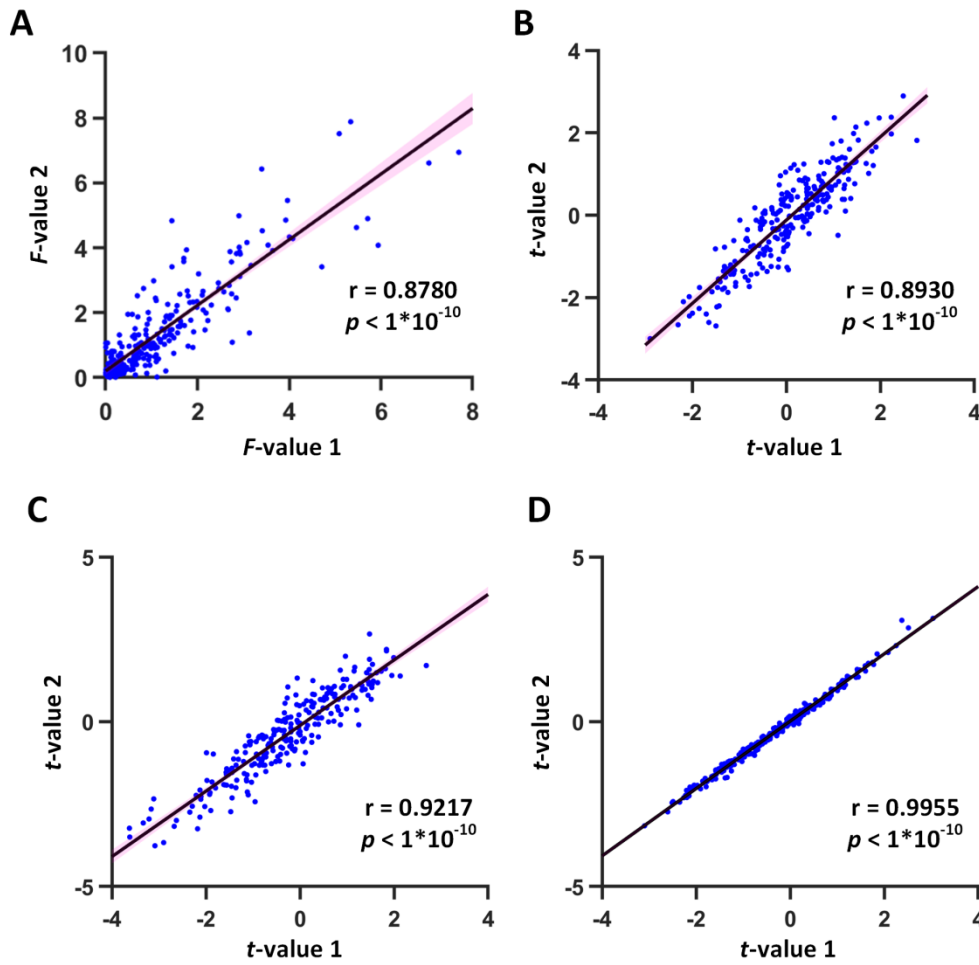

**Supplementary Figure 3. Correlation analyses of the among-group differences in regional CBF-FCS coupling with and without controlling for hypertension and diabetes.** (A) The scatter plot of correlation analyses between the *F*-scores of ANOVA with (y-axis) and without (x-axis) controlling for hypertension and diabetes. (B, C, D) The scatter plots showing the correlation analyses between the *t*-scores of the moderate WMH group vs the mild WMH group (B), the *t*-scores of the severe WMH group vs the mild WMH group (C), and the *t*-scores of the severe WMH group vs the moderate WMH group (D), with (y-axis) and without (x-axis) controlling for hypertension and diabetes.

*r*, Pearson's correlation coefficient. CBF, cerebral blood flow; FCS, functional connectivity strength.



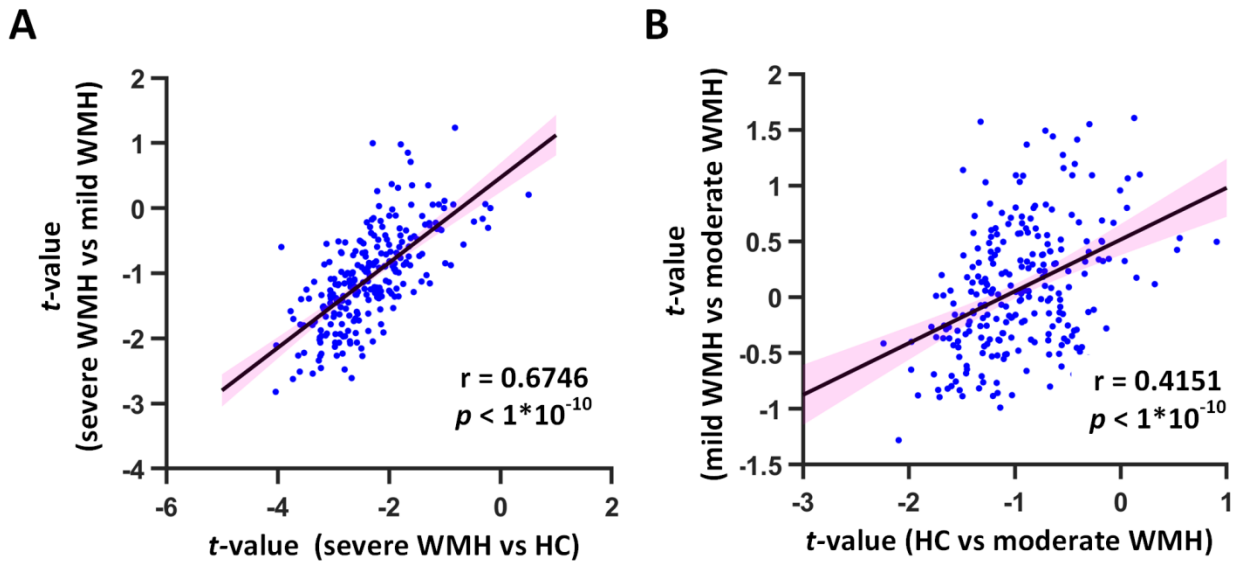

**Supplementary Figure 4. The correlation analyses of between-group differences in regional CBF between the HC group vs the moderate/severe WMH group and the mild WMH group vs moderate/severe WMH group.** (A) The scatter plot showing the correlation analyses between the *t*-scores of the severe WMH group vs the HC group and the *t*-scores of the severe WMH group and the mild WMH group. (B) The scatter plot showing the correlation analyses between the *t*-scores of the HC group vs the moderate WMH group and the *t*-scores of the mild WMH group and the moderate WMH group. Pearson's correlation coefficient of *t*-scores of *t*-test between groups (with age and sex controlled) was calculated at the regional level. The results indicated that whether compared to the mild WMH group or to the HC group, regional CBF in subjects with higher WMH loads (the moderate WMH group or the severe WMH group) exhibited high consistency on alteration patterns.

*r*, Pearson's correlation coefficient. CBF, cerebral blood flow.

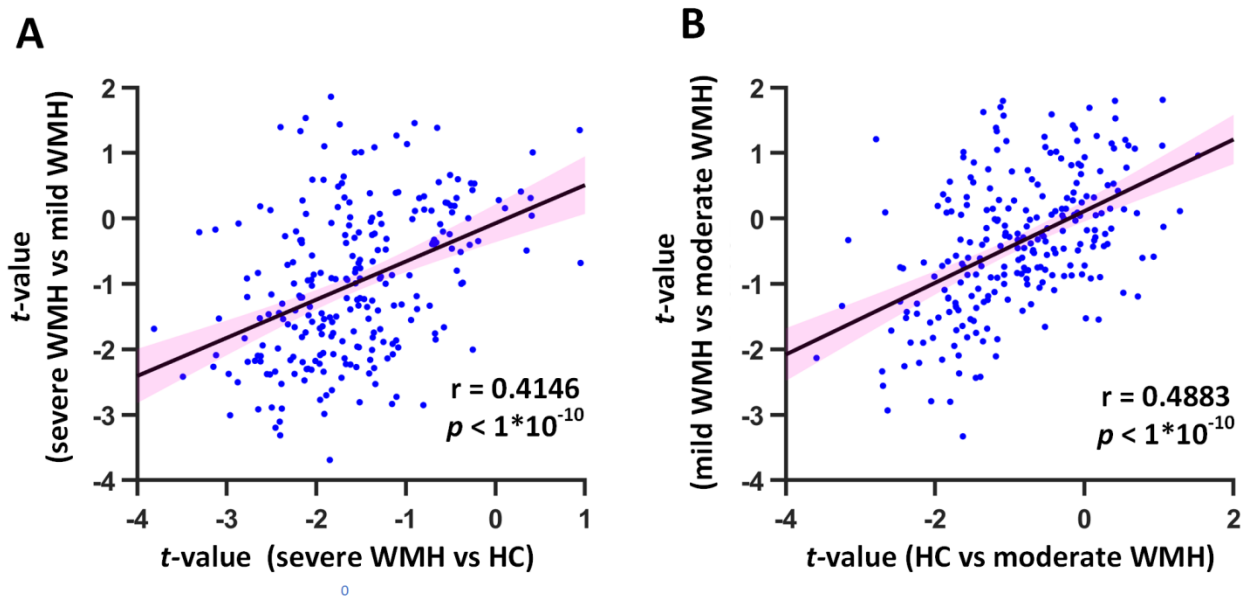

**Supplementary Figure 5. The correlation analyses of between-group differences in regional FCS between the HC group vs the moderate/severe WMH group and the mild WMH group vs moderate/severe WMH group.** (A) The scatter plot showing the correlation analyses between the  $t$ -scores of the severe WMH group vs the HC group and the  $t$ -scores of the severe WMH group and the mild WMH group. (B) The scatter plot showing the correlation analyses between the  $t$ -scores of the HC group vs the moderate WMH group and the  $t$ -scores of the mild WMH group and the moderate WMH group. Pearson's correlation coefficient of  $t$ -scores of  $t$ -test between groups (with age and sex controlled) was calculated at the regional level. The results indicated that whether compared to the mild WMH group or to the HC group, regional FCS in subjects with higher WMH loads (the moderate WMH group or the severe WMH group) exhibited high consistency on alteration patterns.

$r$ , Pearson's correlation coefficient. FCS, functional connectivity strength.

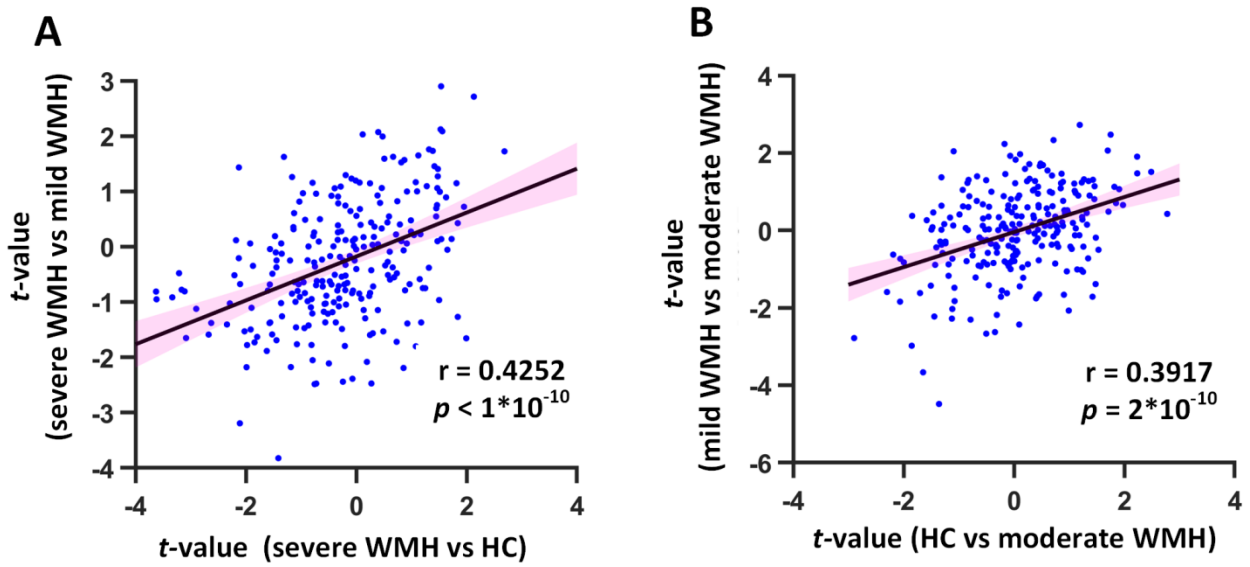

**Supplementary Figure 6. The correlation analyses of between-group differences in regional CBF-FCS coupling between the HC group vs the moderate/severe WMH group and the mild WMH group vs moderate/severe WMH group.** (A) The scatter plot showing the correlation analyses between the *t*-scores of the severe WMH group vs the HC group and the *t*-scores of the severe WMH group and the mild WMH group. (B) The scatter plot showing the correlation analyses between the *t*-scores of the HC group vs the moderate WMH group and the *t*-scores of the mild WMH group and the moderate WMH group. Pearson's correlation coefficient of *t*-scores of *t*-test between groups (with age and sex controlled) was calculated at the regional level. The results indicated that whether compared to the mild WMH group or to the HC group, regional CBF-FCS coupling in subjects with higher WMH loads (the moderate WMH group or the severe WMH group) exhibited high consistency on alteration patterns.

*r*, Pearson's correlation coefficient. CBF, cerebral blood flow. FCS, functional connectivity strength.
